# Supplementary material
Source: publisher site journal article supplement (https://www.spandidos-publications.com/8560/downloadSupplementary)

Figure S1. Animal Grouping and Treatment Protocol. LLC, Lewis lung carcinoma cells; IP, Intraperitoneal; CP, cisplatin; Rg3, ginsenoside Rg3.

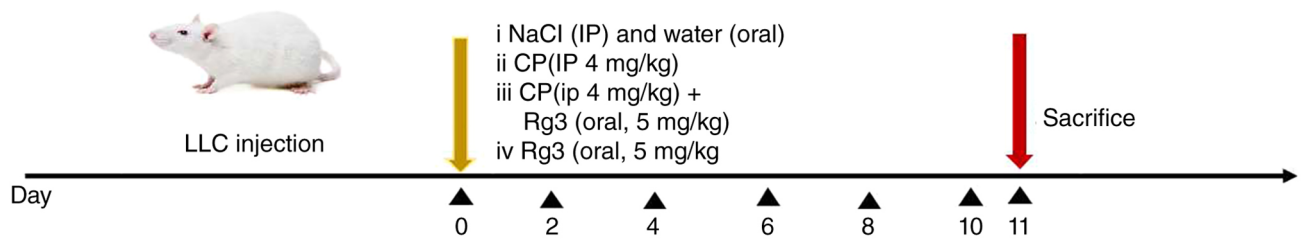

Figure S2. Wound closure after 24 h. \*\*\*\*P<0.0001. CP, cisplatin; Rg3, ginsenoside Rg3.

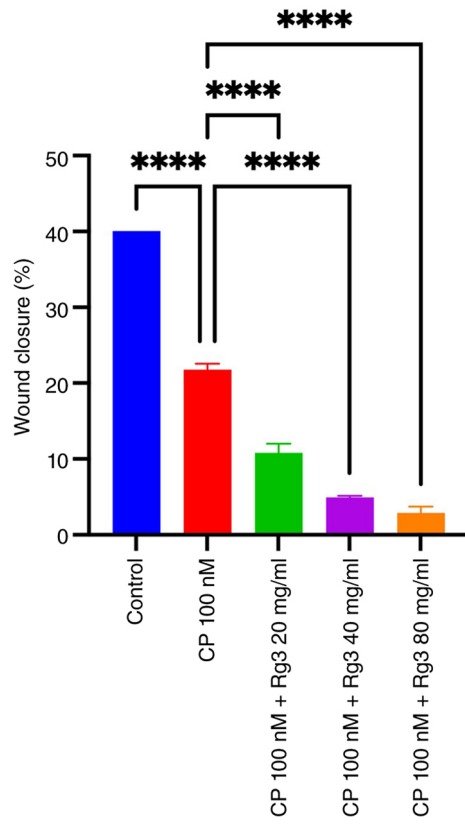

Figure S3. Quantification of OCT-2 staining intensity area in kidney tissue assessed by immunohistochemistry. \* $P < 0.05$ , \*\* $P < 0.001$ , \*\*\* $P < 0.0001$ . OCT, Organic Cation transporter 2; CP, cisplatin; Rg3, ginsenoside Rg3.

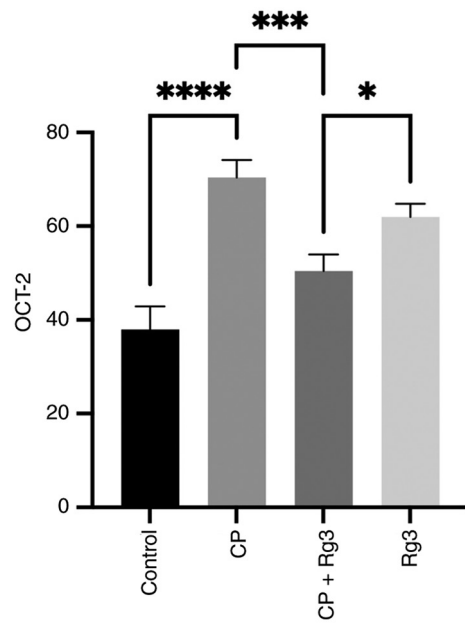

Supplement: Supplementary file 1 [file downloadSupplementary]
